# Supplementary material
Source: PubMed Central journal article supplement (PMC9131364)

online supplemental figure 1

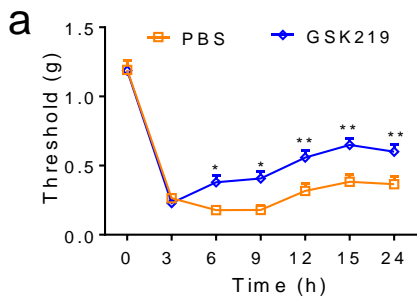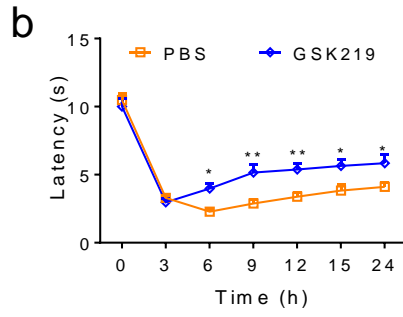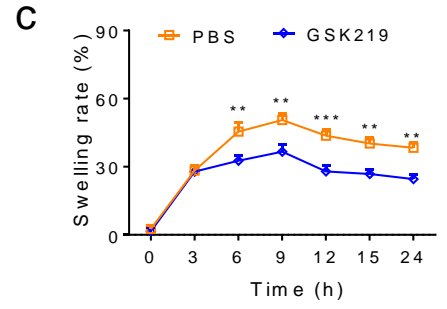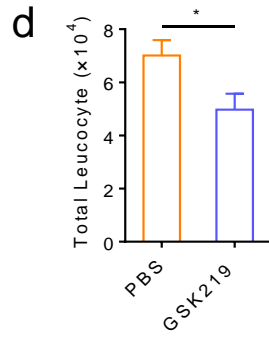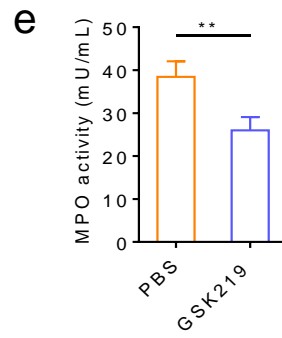

online supplemental figure 2

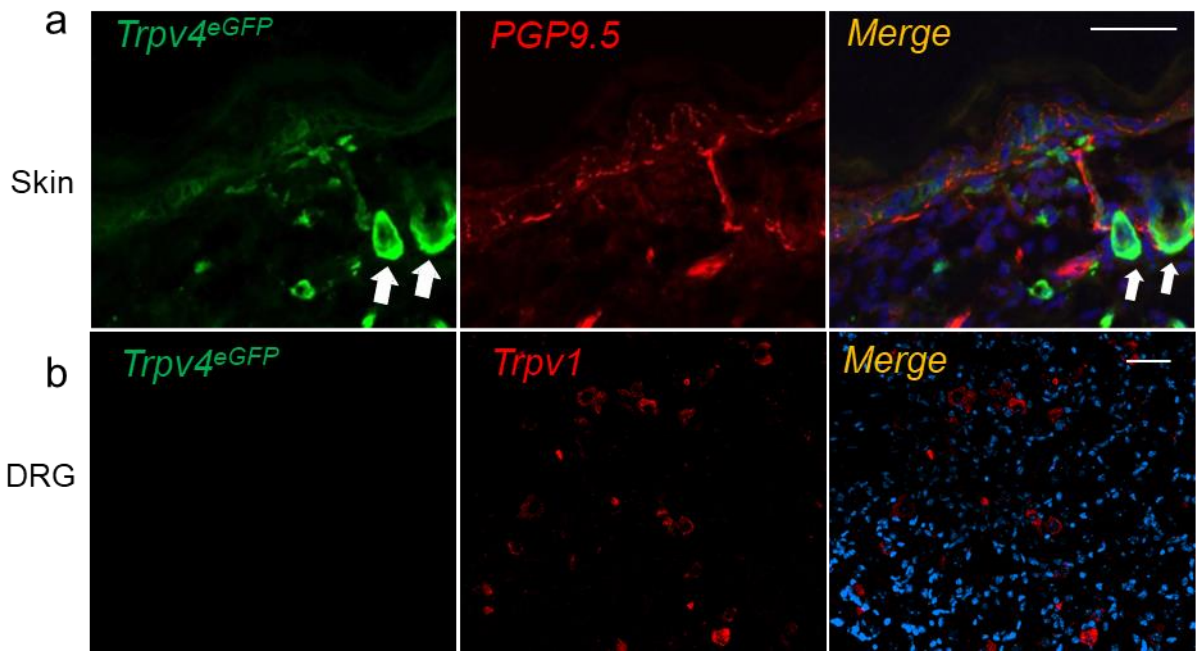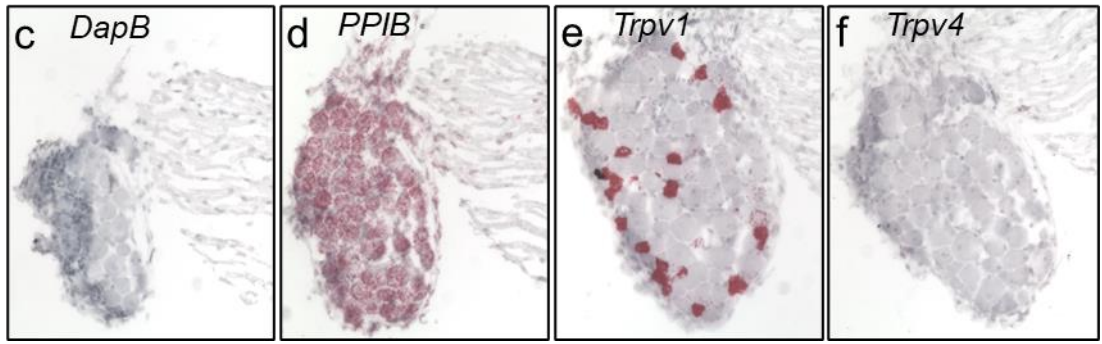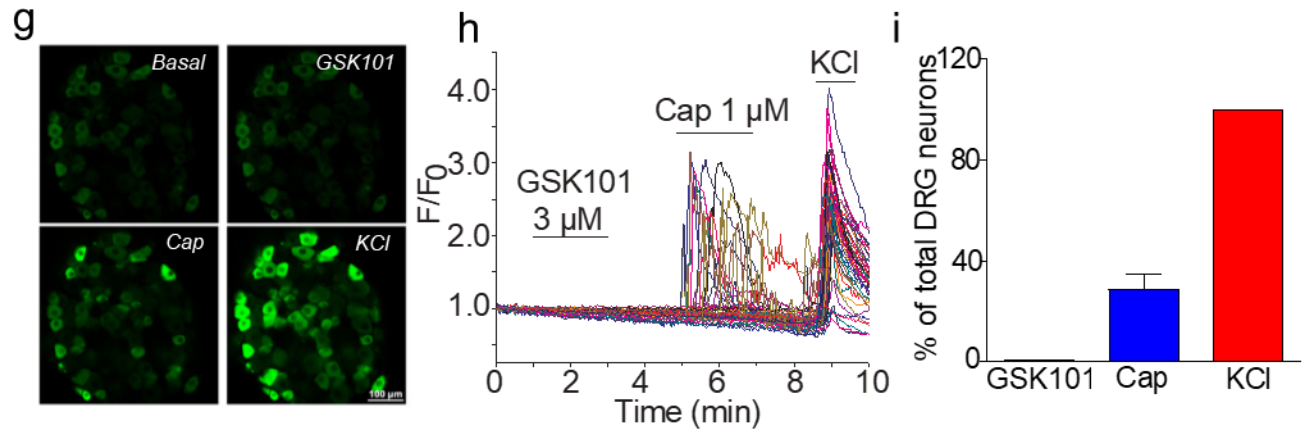

# online supplemental figure 3

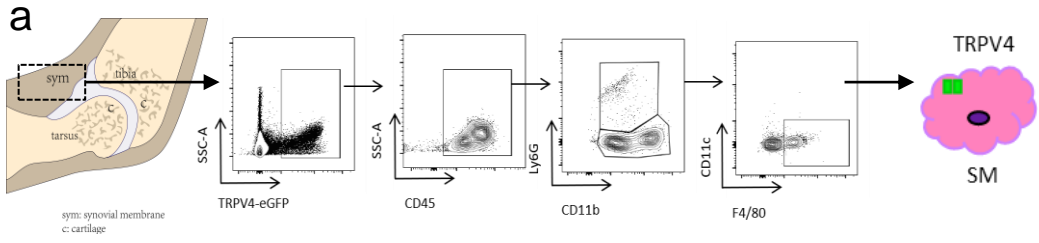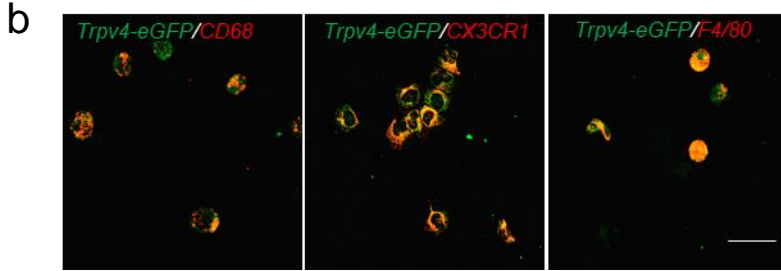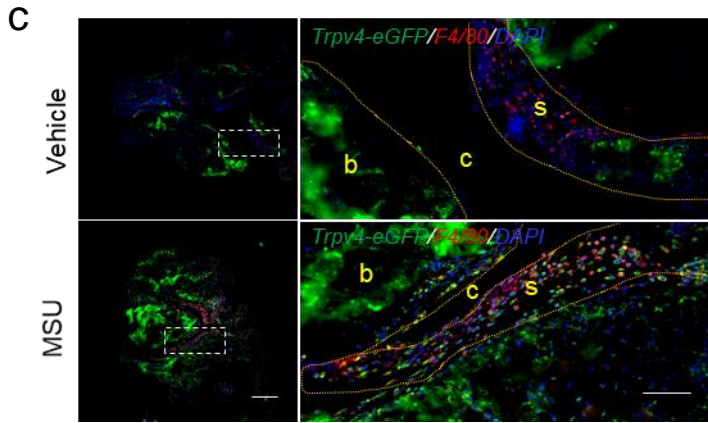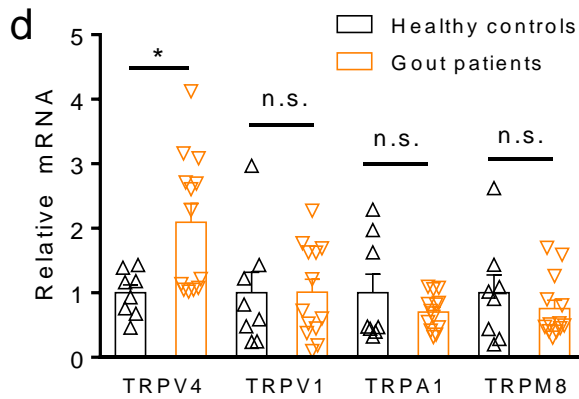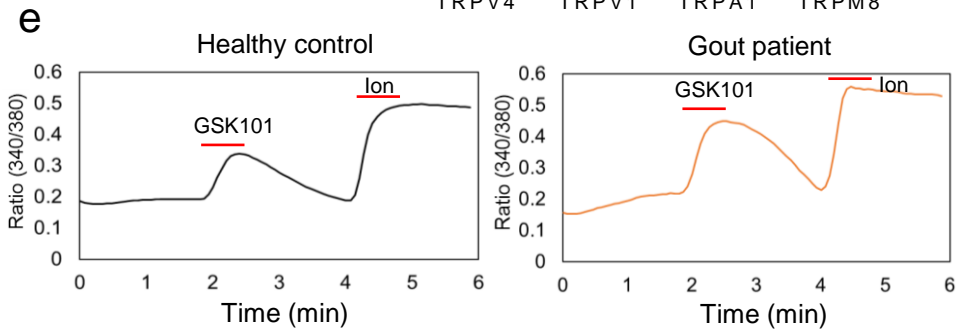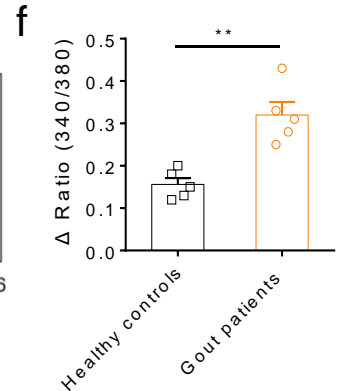

online supplemental figure 4

a

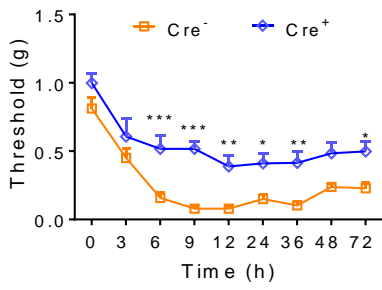

b

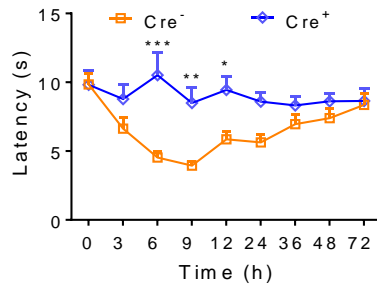

c

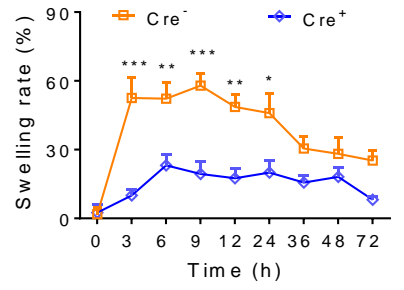

online supplemental figure 5

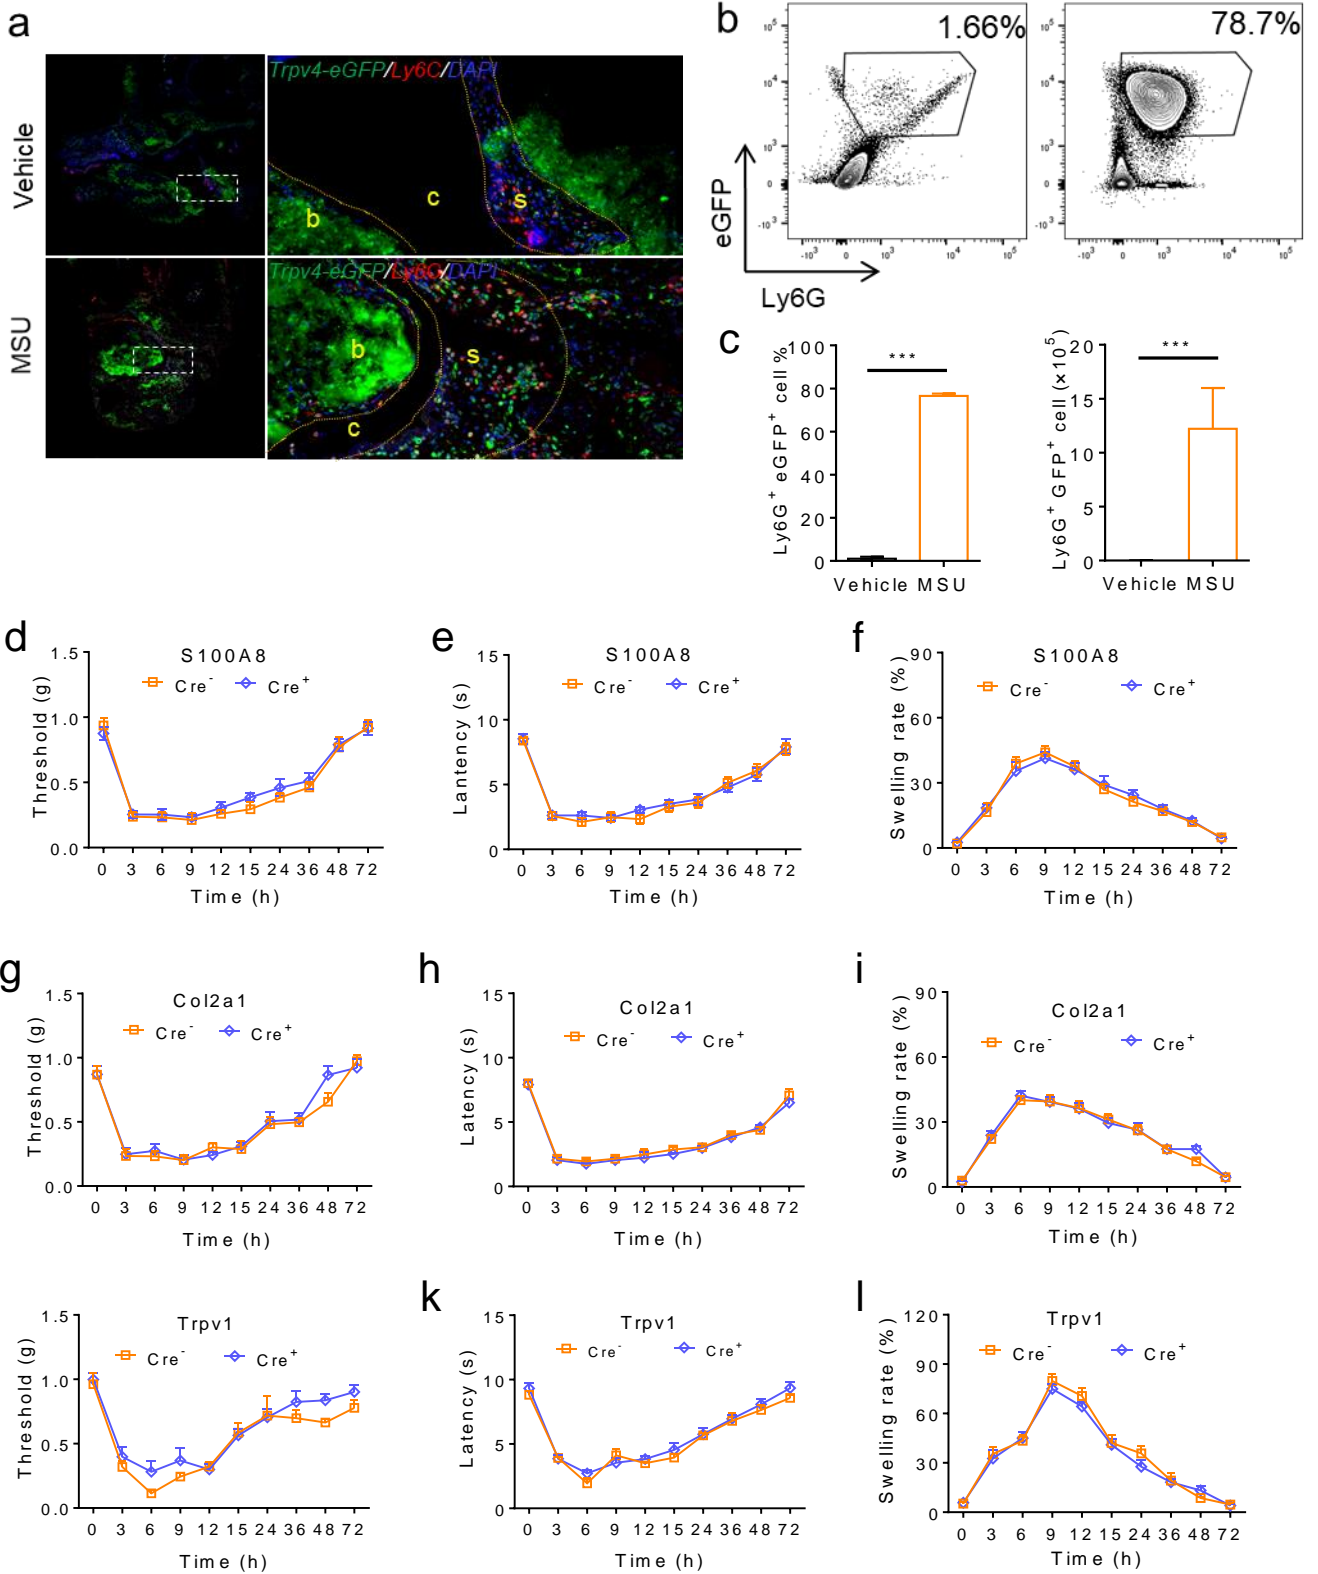

online supplemental figure 6

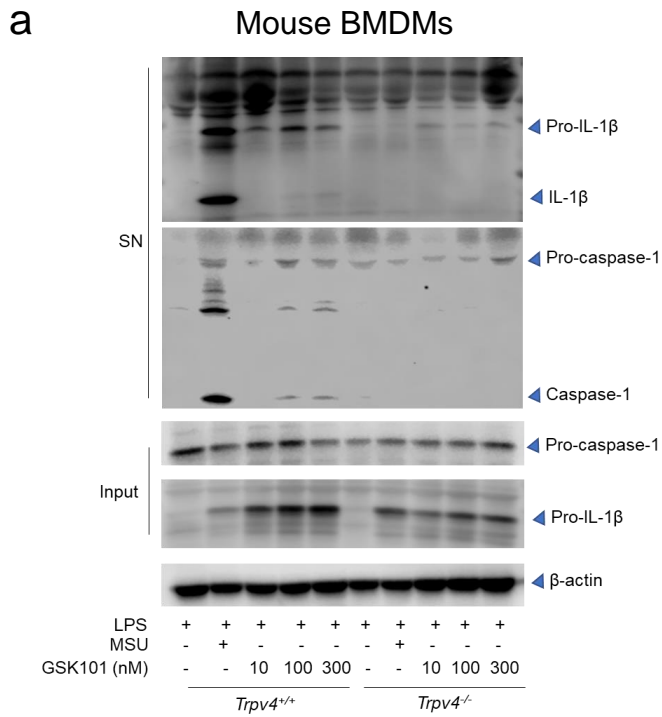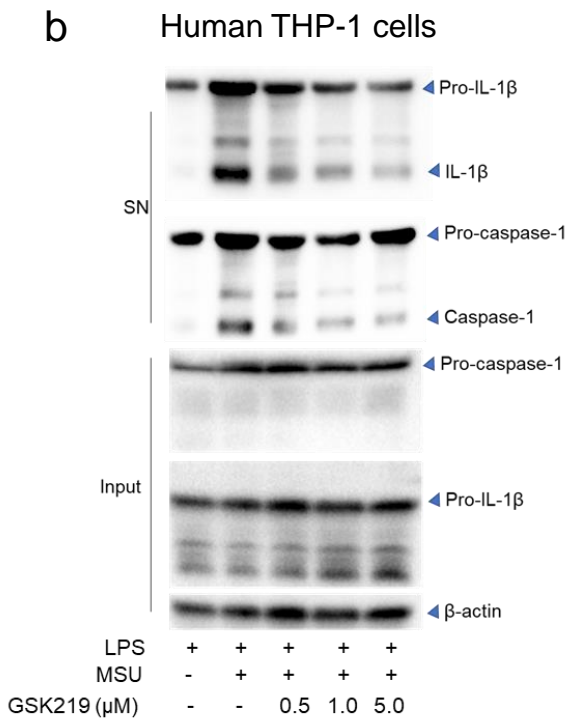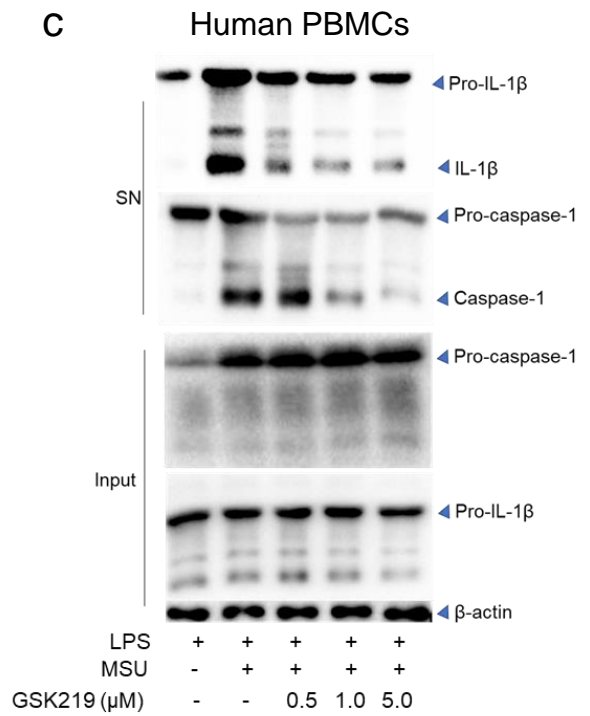

online supplemental figure 7

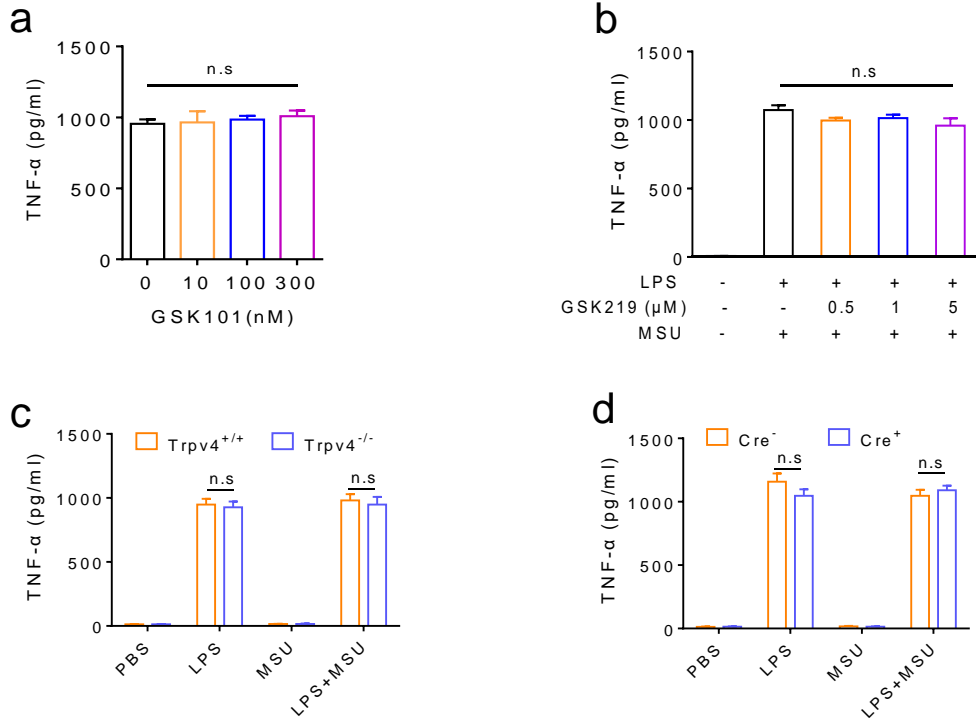

online supplemental figure 8

a

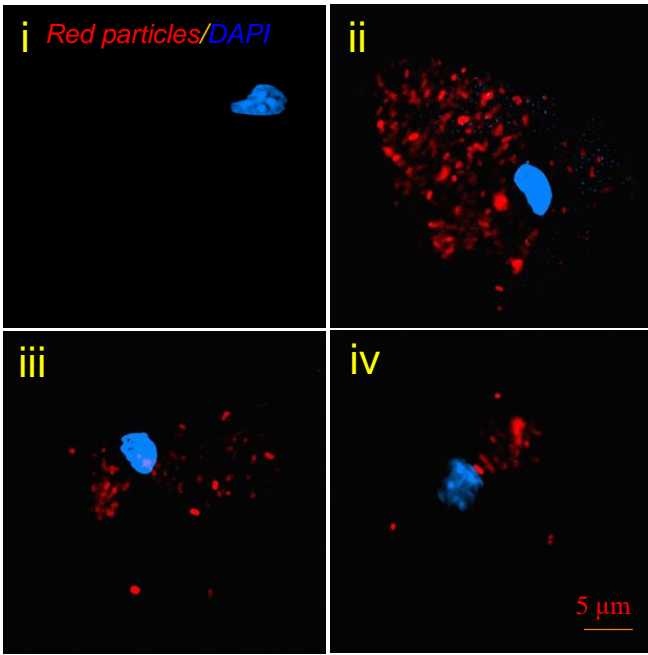

b

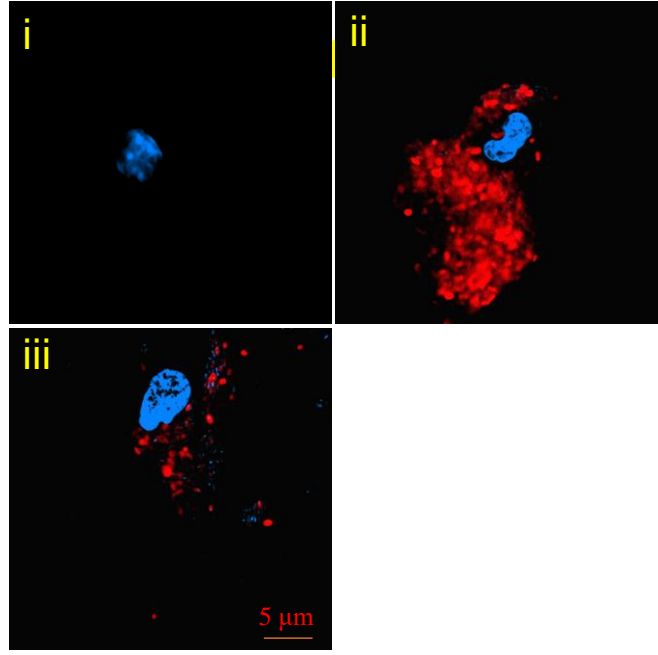



online supplemental figure 9

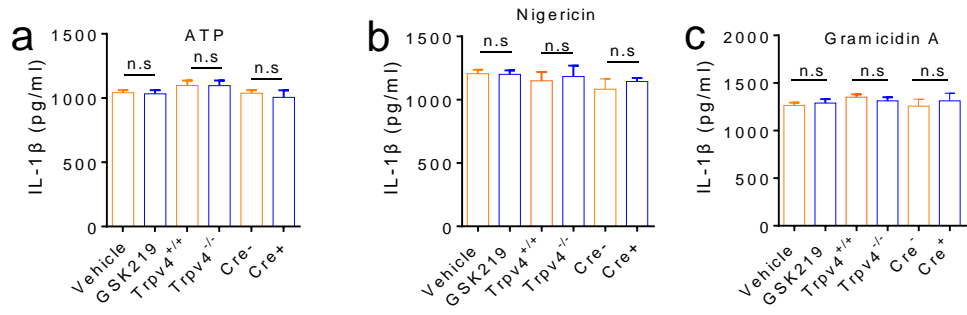

online supplemental figure 10

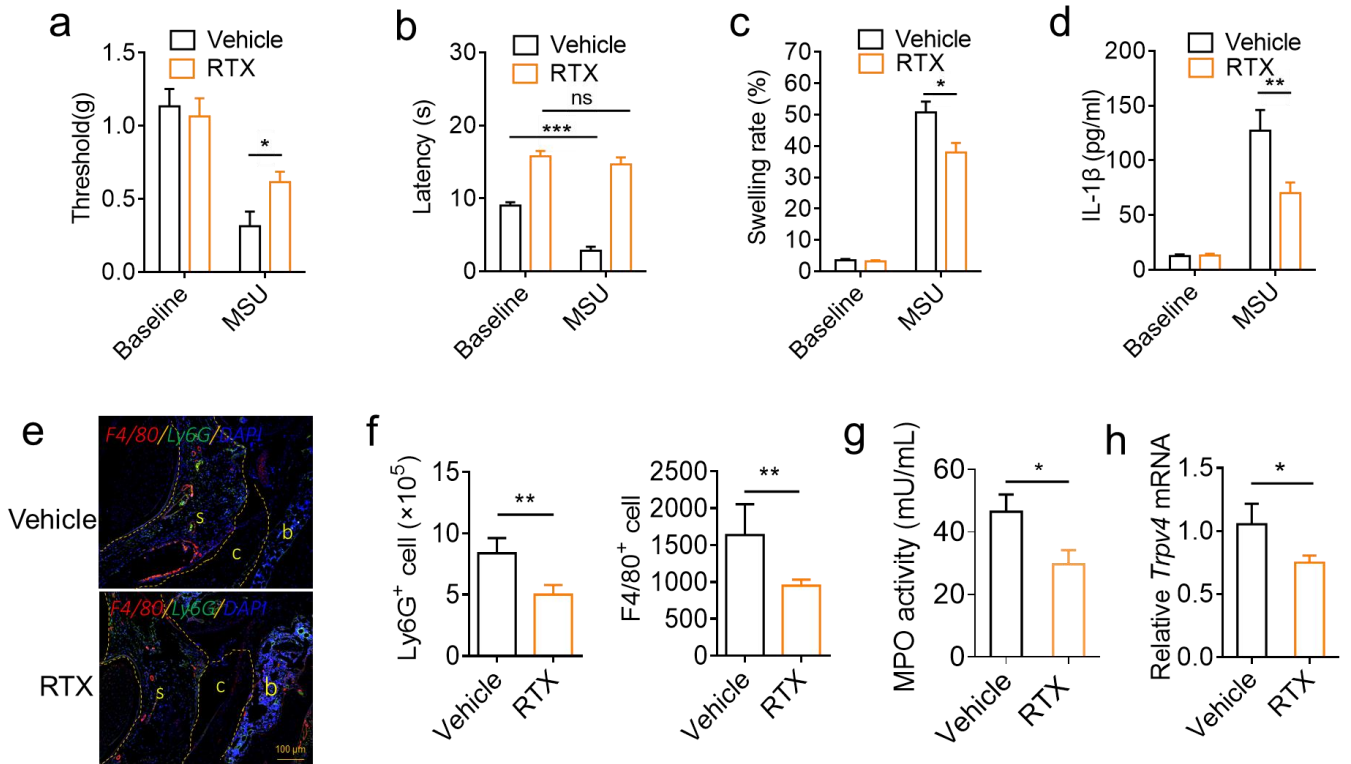

online supplemental figure 11

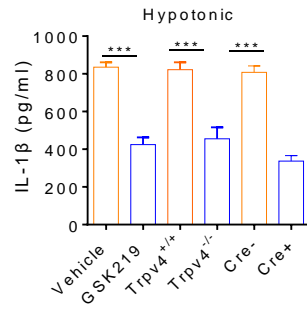

Supplement: NIHMS1807472-supplement-1.pdf [file NIHMS1807472-supplement-1.pdf]
